# Supplementary material for: Academic seminars as tool for clinical and translational science education and dissemination: Perceptions and priorities in the COVID‐19 era
Source: PubMed Central journal article supplement — Clin Transl Sci. 2023 Nov 23;17(1):e13680. doi: 10.1111/cts.13680 (PMC10766022; doi:10.1111/cts.13680), 2023-11-23
Supplement: CTS-17-e13680-s001.pdf [file CTS-17-e13680-s001.pdf]

## Supplemental Document S1. Survey Instrument

# UCLA GIM&HSR Seminar Series End-of-Year Feedback Survey

Drs. Katherine Kahn, Katherine Chen, Carlos Oronce, and Nancy Calderon are requesting your end-of-year feedback on the 2021-2022 GIM&HSR seminar series.

This survey is intended to help us (1) understand how the seminar series is currently impacting you and your work and (2) identify ways to improve the seminar experience.

Participation in this survey is voluntary, and all responses are confidential and anonymous. Your responses will not be linked with prior survey responses or other personal data. Thank you for your help!

\* Required

1) How satisfied are you with the following components of the GIM seminar series this year? \*

|                                                      | Very dissatisfied     | Somewhat dissatisfied | Neither dissatisfied nor satisfied | Somewhat satisfied    | Very satisfied        |
|------------------------------------------------------|-----------------------|-----------------------|------------------------------------|-----------------------|-----------------------|
| Quality of presentations                             | <input type="radio"/> | <input type="radio"/> | <input type="radio"/>              | <input type="radio"/> | <input type="radio"/> |
| Diversity of topics                                  | <input type="radio"/> | <input type="radio"/> | <input type="radio"/>              | <input type="radio"/> | <input type="radio"/> |
| Audience participation                               | <input type="radio"/> | <input type="radio"/> | <input type="radio"/>              | <input type="radio"/> | <input type="radio"/> |
| Seminar format (recognizing the constraints of Zoom) | <input type="radio"/> | <input type="radio"/> | <input type="radio"/>              | <input type="radio"/> | <input type="radio"/> |

2) This year, we've invited faculty with relevant clinical or research experience to join each talk as our invited commentator(s), offering initial reflections and questions following the main speaker's presentation. To what extent is the INVITED COMMENTATOR role helpful in engaging you with the speaker's presentation? \*

|                    |                       |                       |                       |                       |                       |              |
|--------------------|-----------------------|-----------------------|-----------------------|-----------------------|-----------------------|--------------|
|                    | 1                     | 2                     | 3                     | 4                     | 5                     |              |
| Not helpful at all | <input type="radio"/> | Very helpful |

3) We have also tried to stimulate virtual audience engagement by posing 2-3 reflection questions at the start of each seminar. To what extent are the REFLECTION QUESTIONS helpful in engaging you with the speaker's presentation? \*

|                    |                       |                       |                       |                       |                       |              |
|--------------------|-----------------------|-----------------------|-----------------------|-----------------------|-----------------------|--------------|
|                    | 1                     | 2                     | 3                     | 4                     | 5                     |              |
| Not helpful at all | <input type="radio"/> | Very helpful |

4) The GIM-HSR seminar includes a broad range of speakers and topics. Has the diversity of seminar speakers and topics benefited you in any of the following ways? Check all that apply. \*

- Enhanced access to new information, ideas, and conceptual frameworks
- Increased access to experts and/or facilitated opportunities for collaboration
- Enhanced understanding of strategies to engage community stakeholders and historically excluded populations in research and dissemination
- Provided exposure to new research methods and/or presentation strategies
- Changed and/or enriched my clinical practice
- Other:

5) Which of the following would you like to see included as priorities for the seminar series going forward? Check all that apply.

\*

- Greater engagement with speakers and attendees across departments and divisions beyond GIM&HSR
- More attention to community-partnered research and diversity, equity, and inclusion in health services research
- Greater emphasis on population health and health equity research
- Greater emphasis on implementation science
- More research presentations highlighting strengths and weaknesses of research methods (e.g., novel methods in causal inference or machine learning)
- Innovative and/or non-traditional seminar format (e.g. "lightning talks," interactive elements, facilitated debates, journal club to workshop in-progress manuscripts or grant applications)
- More social media engagement
- Post-seminar networking opportunities
- Other:

6) Do you have any additional comments or suggestions about the seminar series?

Your answer

7) How would you describe your role at UCLA? (check all that apply) \*

- Clinician
- Researcher
- Faculty
- Student or resident
- Fellow
- Administrator or staff
- Other:

8) Do you identify as part of a group that is underrepresented in medicine and/or health services research? \*

- Yes
- No
- Not sure / prefer not to answer
